# Supplementary material for: Factors Contributing to Mental Health Professionals' Decision to Use Seclusion
Source: Atypon-hosted journal article supplement (doi:10.1176/ps.62.5.pss6205_0498), 2011-05-01
Supplement: Mann-Poll_DS.pdf [file Mann-Poll_DS.pdf]

**Study design:  
adapted RAM**

**Process:**

**Product:**

***Step 1:***  
Delphi  
(expert panel n = 7)

**18  
Vignette variables**

***Step 2:***  
Generate orthogonal  
design  
Construction of 64  
vignettes and socio-  
demographic list

**64 vignettes**

***Step 3:***  
Data collection

**Dataset**

***Step 4:***  
GLM Analysis  
-18 vignette  
variables  
-11 rater  
characteristics

**Model :**  
12 main explicators:  
-seven vignette  
-five rater  
-interaction effect
